# Supplementary material for: How to deal w___ missing input data
Source: Copernicus journal article supplement (doi:10.5194/egusphere-2025-1224), 2025-04-07
Supplement: Supplementary file [file egusphere-2025-1224-AC2-supplement.pdf]

# Responses to Reviews

## How to deal w\_\_\_ missing input data

<https://doi.org/10.5194/egusphere-2025-1224>

### RC1

Dear Martin and others,

It was a pleasure to review your manuscript on "*How to deal w\_\_\_ missing input data*", submitted to the Hydrology and Earth System Science journal. I found your study to be well-structured, informative, and a very pleasant read. The experiments are clearly motivated, performed, and analyzed. I think this is a valuable contribution to the field.

I have provided a list of minor comments for your consideration below. Most of these do not require urgent revisions. Most comments are regarding clarity especially for readers that may not have much experience regarding methods like embedding and attention. The authors have already provided additional material which is much appreciated.

I have no doubts that the authors will be able to respond to all my comments without any problem. Hence, I am recommending minor revisions. I appreciate the effort you have put into this work and would be happy to have another look at the revised version.

Best regards,  
Julie Mai

Thank you Julie for your very detailed review! Please see our inline answers below.

Detailed comments:

#### ***Introduction***

- Title & Abstract: I like the title and the clue that this manuscript deals with missing information. Maybe it would be good to make that connection at the end (or elsewhere) in the

abstract. Something like: “[...] or not arrive at all; like the missing characters in ‘to deal w\_\_\_\_ missing input data’.”

Explaining a joke ruins it, so we prefer to get the smiles of those who get it and let everyone else discuss the paper with their colleagues to understand.

- Figure 1: Mention in the caption that “gray” indicates missing data and shades of “blue” mean data available (?!). What I don’t understand is why the yellow box indicates where models are not robust. Isn’t that where all data across both basins are available and complete and hence this is where the model is robust (given that only forcing group 1 and 2 are used and 3 is discarded)? Some more detailed explanation may be required.

We’ve clarified that gray bars are missing data, thanks, that is a good point. As for the yellow box: The annotation “model not robust” here refers to a model that has no mechanism to work with missing data. Such a model could only be trained on the subset of data represented by the yellow box. I.e., it could not make use of forcing group 3 and could only use less than half of the time (represented by the horizontal axis in that figure). The opposite is true for a model that is robust against missing data (e.g., using any of the methods presented in this manuscript). Such a model could use all of the available data inside of the purple box. We have slightly expanded the caption to hopefully make this point more clear.

- Lines 37-42: Would it be possible to make a connection of these three cases to Figure 1? E.g., first setting is top case in Fig 1? Maybe there is a way to adjust Figure 1 to be used not only for illustrating various kinds of missing data but also used for these three cases? Optional to address. May just be helpful for readers to understand the three experiments better.

Good idea, done.

- Lines 52-53: Use of term “downstream model”. I am assuming that it is “downstream” in the modeling process and not downstream in a hydrologic sense. It may be good to clarify this. The word “downstream” was not necessary in the sentence that already says “subsequently”. Deleted.

### **Data and methods**

- Footnote on page 3: “Unlike what is mentioned in the paper, ...”. I am assuming that the Kratzert et al. (2021) is referred to. I haven’t consulted both tables of static attributes yet and am confused if “p\_seasonality” is or is not a static attribute in the study presented here. Maybe this footnote would be better placed with the list of actual static attributes to be less confusing as I assume that using/not using this static attribute does not make a huge difference?!

Yes, we were referring to Kratzert et al. We’ve updated the footnote to clarify that. And as you say, we don’t expect this to make much of a difference.

- Figure 2:

- "NaNs in the input data for a given time step are replaced by zeros, ..." → I would mention that this is what happened to the three example entries for forcing group 2 (grey means zero).

Done.

- I would recommend having four instead of three example entries for each forcing group. This way it becomes clearer that the binary flags are per forcing group and not per basin. Unfortunately, it's complicated. If we use four boxes in the forcing groups, the embeddings end up having the same size as the inputs which is also not ideal (we'd like to emphasize that the embedding size can be entirely different from the number of inputs). So to disambiguate all of these cases, we'd end up with a lot of boxes and cluttered illustrations. We have instead expanded the caption of the figure (see next response) to further clarify what each visual element represents.

- Maybe mention that this example shows forcing available for three/four basins. Initially I thought time steps... I know it is all in the caption, but it took me a second to wrap my head properly around this.

The boxes of each forcing group are intended to represent different variables (like precipitation, temperature, ...) and not basins. That is why different products have different amounts of boxes. We can see how that was not clear from the figure. Unfortunately, the more boxes we add the more complicated (and the harder to layout) the figures become. Instead, we have added a brief explanation in the caption.

- Why is the third entry in forcing group 3 not set to zero even though it seems it is not available (NaN) for one of the basins? I would recommend explaining this a bit more in detail. This seems crucial as the binary flag seems to be only set to 0 if a forcing is not available at any basin.

See above (boxes are variables, not basins). We have changed the description to clarify.

- Lines 82-83: "each of them yielding an embedding vector of the same size" → Not an expert of embedding networks. What is the size of the resulting embedding vector. In your example (Fig 3) it is 4. Is that a hyper-parameter of the embedding network? Some information on that may be helpful.

Yes, this is a hyperparameter. Appendix A describes this in more detail – we tuned both the hidden and output size of the embedding networks.

- Line 83: "average the non-NaN embeddings" → Again, my limited knowledge of embeddings here: Under which circumstances can embeddings be NaN? It may be helpful to have such an example in your Figure 3 (vectors shown as list in "avg()").

The NaN embeddings are exactly the ones that correspond to providers which were

unavailable at a given time step. We've clarified this in the updated manuscript.

- Lines 92-93: "Appendix D provides a brief introduction to the concept of attention for readers who are not familiar with the topic." → Much appreciated! Great job explaining this with intuitive examples.

Thanks!

- Figure 4:

- There is some overlap of text in top left corner.

We've added a bit more space between "static attributes" and "binary flags" to better separate those two labels visually.

- Is it a coincidence that there are 4 static attributes and the length of your embeddings is 4 as well?

Yes. In practice there are 26 static attributes and the embeddings have a size of 10.

- What are the binary flags used for? Aren't they already implicit by you only creating two embeddings and none for forcing group 2? If the binary flags are important to inform the number of embeddings created, why are the binary flags not part of the masked mean figure (Fig 3)? Guessing that this is a "requirement" of the attention framework?!

The binary flags in the attention allow the model to explicitly change the query depending on feature availability. It is true that implicitly the model also knows about feature availability without those flags, but it might be harder to use that information if it is only available implicitly through the unavailability of certain key/value vectors.

- Make explicit in caption that "k/v" means "keys and values".

Done.

- Lines 96-98: In the masked mean you decided not to use static attributes as they only deteriorated the performance. For attention networks you decided to use them. I am assuming that the performance increased by using them. If so, I would mention this like you reporting on this already for the masked mean (lines 84-86).

The reason we use static attributes for the attention mechanism is that we need some sort of input that forms the query. Only using the binary flags as a query would make it impossible for the model to shift its attention depending on the location, which was the premise of the architecture. Hence, we did not explore attention without the static inputs. We expanded the description of the attention approach to further explain the purpose of the static attributes.

- Figure 5: The caption does not make a connection to the legend. I know the text explains that the (random) subset of basins was assumed to have three data products while the rest is assumed to have only 2 products available, but this should be put in the caption to explain the

figure without the need to look up in the text what it actually means.

Adapted the caption to be more verbose.

- Experiment 3: Lines 129-137: What do you think is the impact of you picking the worst performing of the three products, i.e., NLDAS (see lines 115-116) as the additional one for the subset of 51 basins? Your motivation for this experiment was that “higher quality” forcing may be available locally. Shouldn’t you have picked the best performing forcing as the additional one?

Interestingly, despite NLDAS being the worst single-forcing model, Figure 3 from [Kratzert et al. \(2021\)](#) shows that the largest gap between two- and three-forcing models occurs when holding out NLDAS. An explanation for this behavior might be that NLDAS could represent the “odd one out”, i.e., even though being wrong more often, its errors might have little correlation with those of Daymet and Maurer and therefore present additional useful information.

## Results

- Figure 6:
  - “NaN probability” equals “p\_time”, right?  
Yes.
  - I would probably sort the various approaches in the legend in the order they are introduced (replacing, masked mean, and attention). Same for figures 7 and 8.  
Done.
  - I’d potentially cite Kratzert et al. (2021) for the two reference results (dashed and dotted line) to emphasize that this was done previously. Again, this is only to make the figure content somewhat independent from the rest of the text.  
Done.
- Line 145: “while masked mean is slightly better in KGE” → it looks like input replacing is also better in KGE at p\_time=0.0.  
Correct, updated the description to reflect that.
- Lines 149-150: “except for p\_time = 0.2, the masked mean results are significantly better than those of input replacing” → I can’t really see that in the plot. The median value for blue (masked mean) and yellow (input replacing) seem both to be around 0.775. Are they only significantly different in terms of the one-sided Wilcoxon signed-rank test? Is that the only result where a significant difference was detected?  
Our statement is correct: p\_time = 0.2 is the only setting where the one-sided Wilcoxon test cannot reject the null hypothesis “masked mean performs equally or less good than input replacing” at  $\alpha = 0.05$ . Note that the results of the (paired) statistical tests do not necessarily

have to be clear from the figure that shows only the medians. In a different figure (e.g., a CDF comparing the results of just  $p_{\text{time}}=0.2$ ), it might visually be more clear. Here, however, we want to show the performance as  $p_{\text{time}}$  increases, which is hard to also combine with the full distribution of values at each  $p_{\text{time}}$  value without cluttering the figure. Nevertheless, visually, the figure is in agreement with those results:  $p_{\text{time}} = 0.2$  is the only point along the x-axis where the yellow shading (input replacing) runs higher than the blue shading (masked mean).

- Line 161: “exact forcings that are available at inference time” → “exact forcings that are available at inference time (dashed line)”

Done.

- Line 161: “performs significantly better” → based on a statistical test or just from looking at plots? I can’t really see a difference between the dashed CDF lines and the colored CDF lines; especially in the right column of Figure 7. It may be that you are talking in this paragraph about the single forcing results (left column) but it’s not clear from the text. Only when you start the next paragraph it is suggesting that you were only looking at single-set results (probably)?

Based on a statistical test (we made sure to only use the word “significant” in the scientific sense).

You are right that the wording was confusing; we are indeed focusing on the single-forcing experiments (left column of Fig. 7) in this paragraph. We’ve clarified this in the updated manuscript.

- Line 160: Is the highlighted result for NLDAS-only likely happening because NLDAS was the worst performing dataset in general?

While we cannot say for sure, this seems like a plausible explanation. Note, however, that the effect sizes are very small in all cases, so the practical implications of this finding seem limited to us.

- Line 172: “The three-forcing model trained only on the 51 basins ...” → Maybe call this “regional model” here explicitly or say that this refers to the dashed line in the plot to make it easier to connect these things

Good point, changed.

- Figure 8: Can “regional model” in the legend include that it is using all three forcings? Like the legend entry for the “global model”. Easier to connect to the text (line 172 etc.).

Done.

- Lines 174-175: “However, from a practical hydrological perspective, all approaches perform quite similar, despite the statistical significance.” → I like this sentence. I think this may also

be something that could be added to the results for experiment 2.

Added similar wording to experiment 2.

### ***Discussion and conclusions***

- Line 183: "unable to outperform the baseline trained on all three forcings but only 51 local basins (experiment 3)" → may this also be caused by the additional third forcing not being "better" than the others but indeed shown previously to be the least performing?

See our response above; holding out NLDAS is expected to cause the largest deterioration (at least on the CONUS-wide comparison from Kratzert et al. (2021). Nevertheless, at a higher level, we agree with the reasoning behind your argument, as we already state the high-quality forcings a likely reason for the limited differences between approaches.

- General: Is there any notable difference in computational expense or difficulty in implementation between the three methods? This may also be factors for practitioners to select one method over another.

The attention mechanism is certainly more tricky to implement than the other two approaches, which contributes to our conclusion that "Therefore, in its current form, attention appears unnecessary" (L196). The other two approaches are quite simple to implement and (compared to the core LSTM time series model component) have minor effects on computational expense, so we would not consider this a major factor in the decision for one of the approaches.

### ***Appendix***

- Figure C1/C2: It would be great if you could add a reference for the definition of all the additional metrics.

Done.
